# Supplementary material for: Metabolomic Profiling and Genomic Study of a Marine Sponge-Associated Streptomyces sp
Source: Mar Drugs. 2014 Jun 2;12(6):3323–51. doi: 10.3390/md12063323 (PMC4071579; doi:10.3390/md12063323)

**Figure S1.** Proton NMR of pooled fractions 221–230.

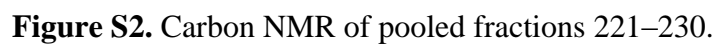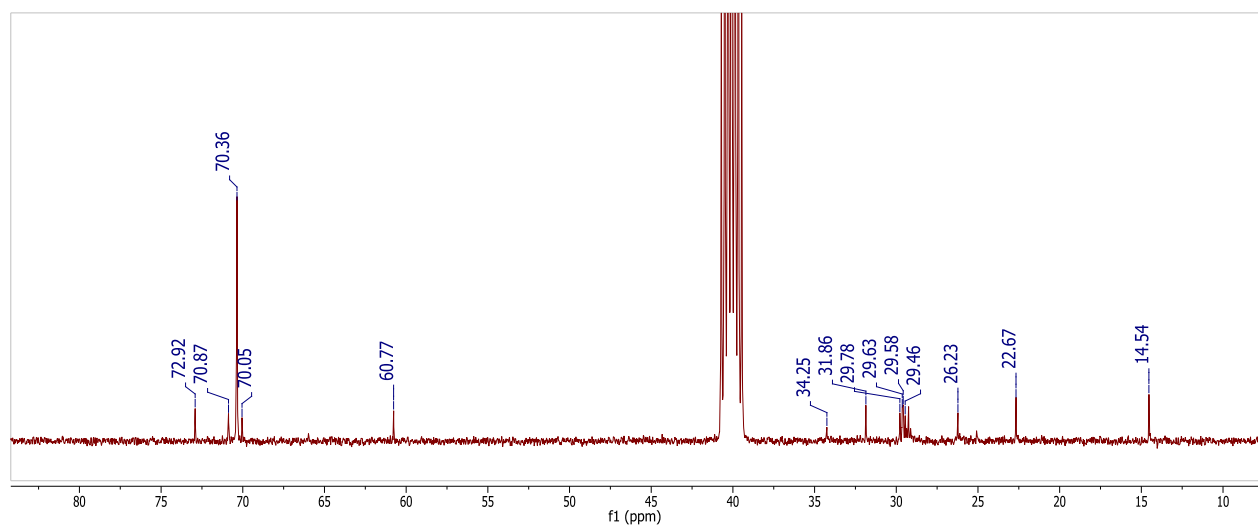

**Figure S3.** HMBC of pooled fractions 221–230.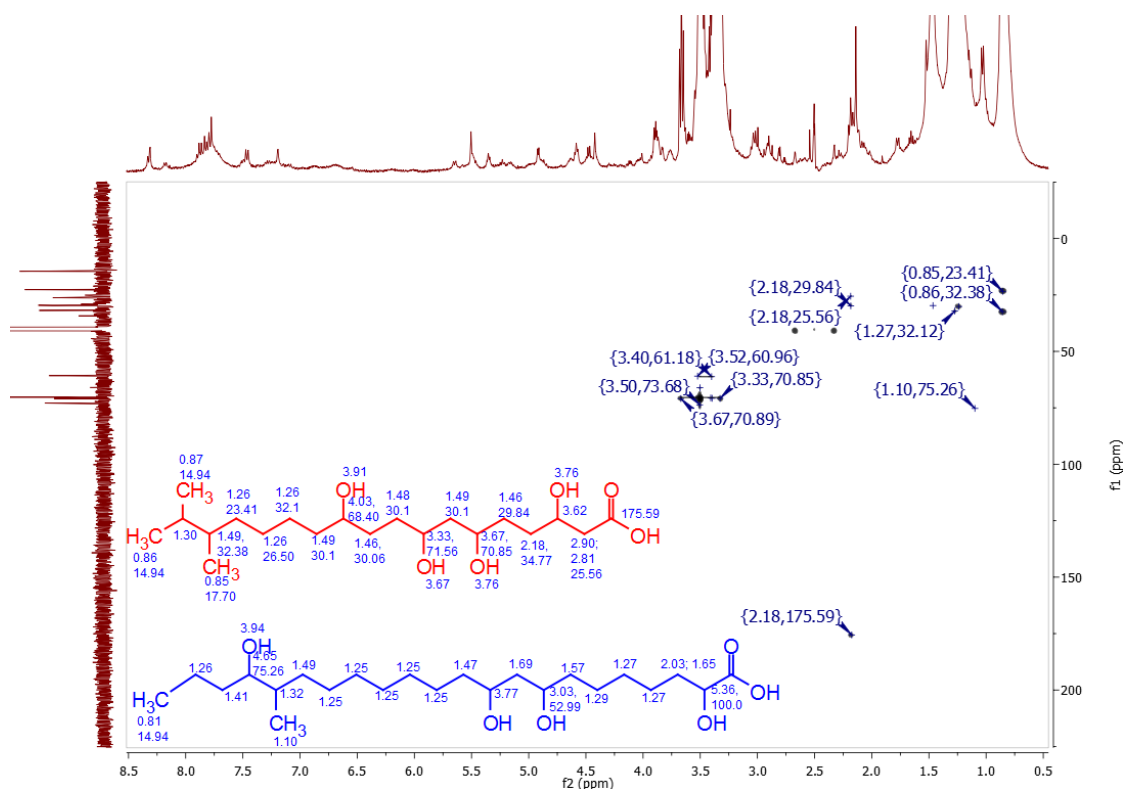**Figure S4.** HMQC of pooled fractions 221–230.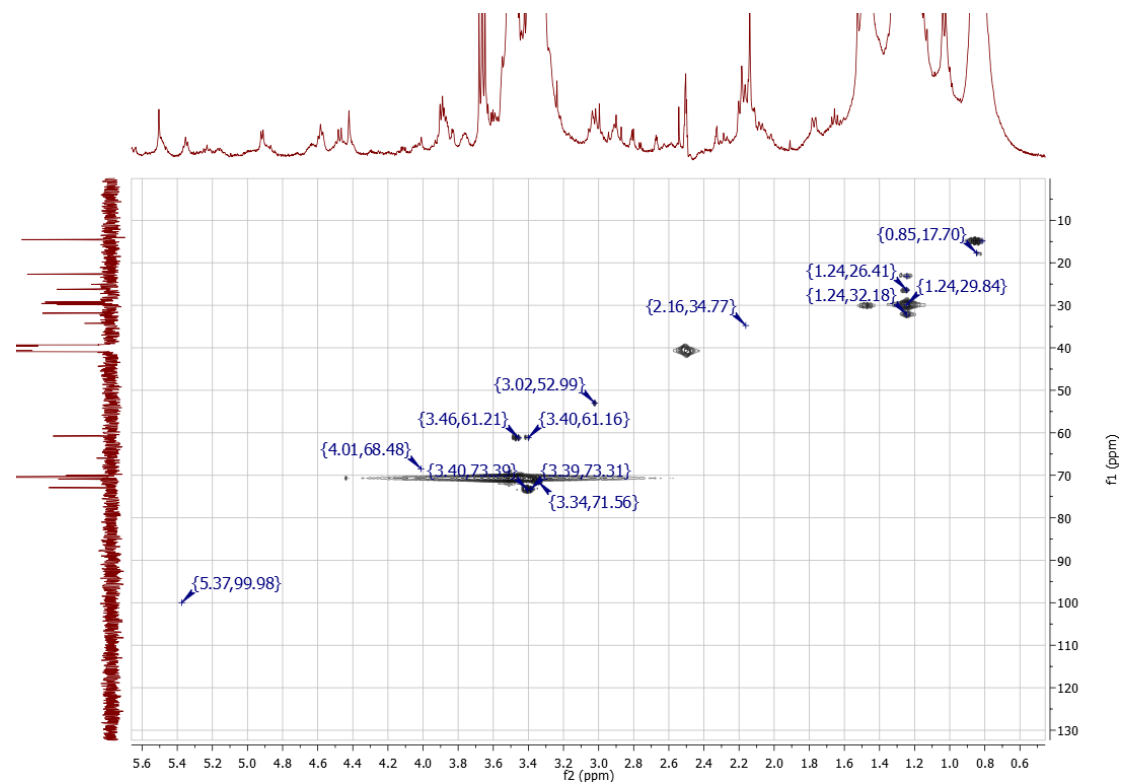

Supplement: Supplementary File 1 — Supplementary Information (PDF, 447 KB) [file marinedrugs-12-03323-s001.pdf]
